# Supplementary material
Source: PubMed Central journal article supplement (PMC6418430)
Supplement: IMM-156-356-s001.pdf [file IMM-156-356-s001.pdf]

Standard

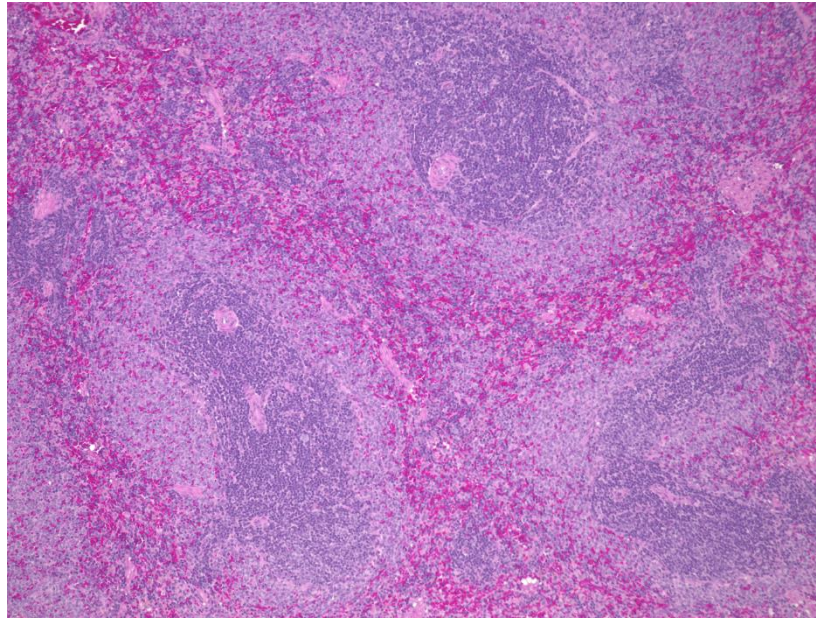

Zinc-deficient

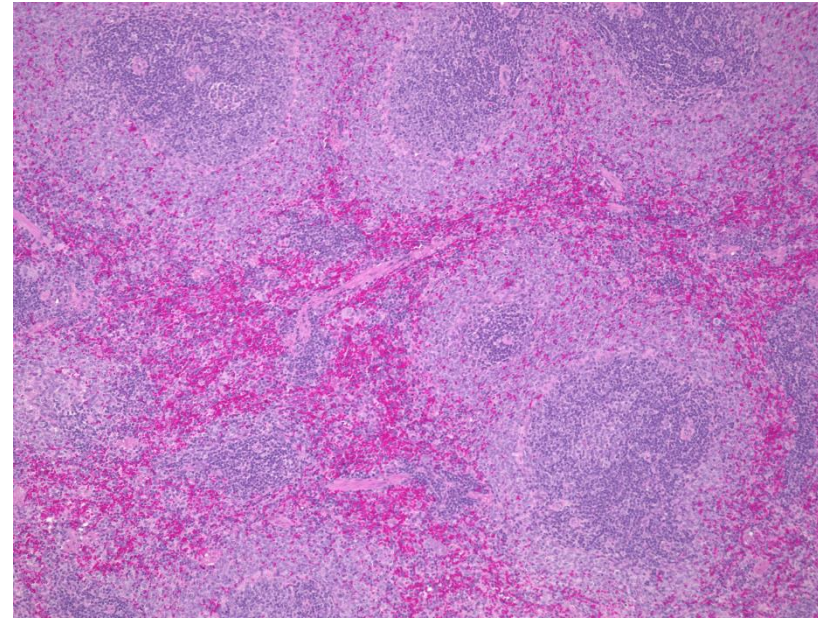

Zinc-deficient/IL-4 i.p.

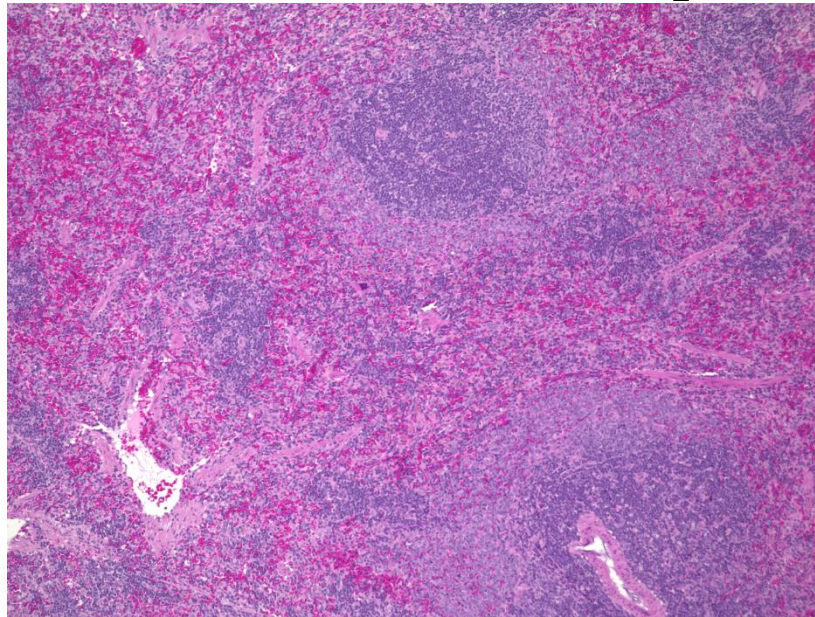

Zinc-deficient/Standard

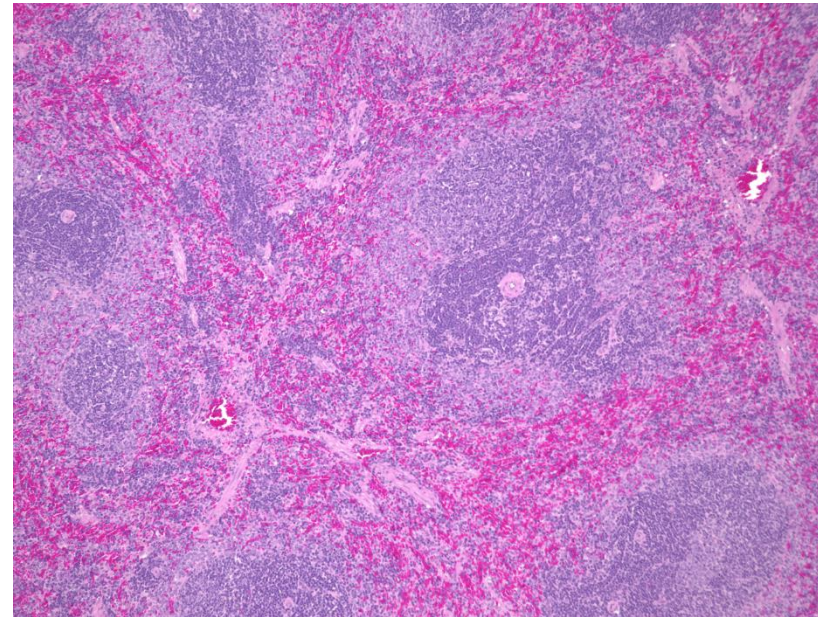

**Supplemental Fig. 1. Representative spleen sections obtained from rats on standard diet and zinc-deficient diet and injected with either saline (zinc-deficient) or IL-4 (zinc-deficient/IL-4 i.p.), or subsequently switched to a standard diet (zinc-deficient/standard). The sections were stained with hematoxylin and eosin. Magnification,  $100\times$  i.p., intraperitoneal; IL, interleukin.**
