# Supplementary material
Source: PubMed Central journal article supplement (PMC6418430)
Supplement: IMM-156-356-s002.pdf [file IMM-156-356-s002.pdf]

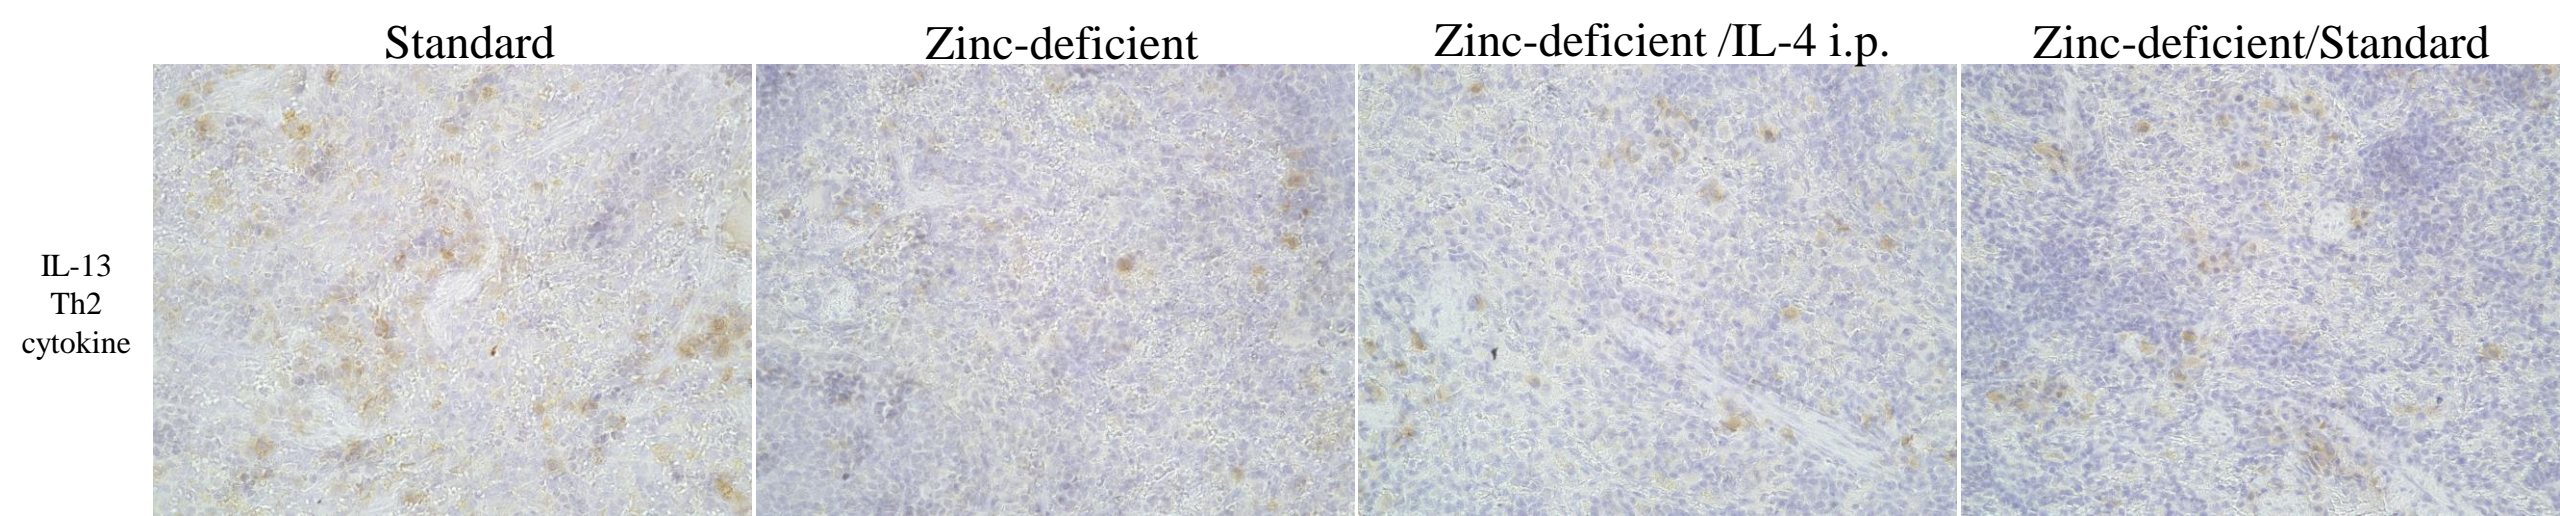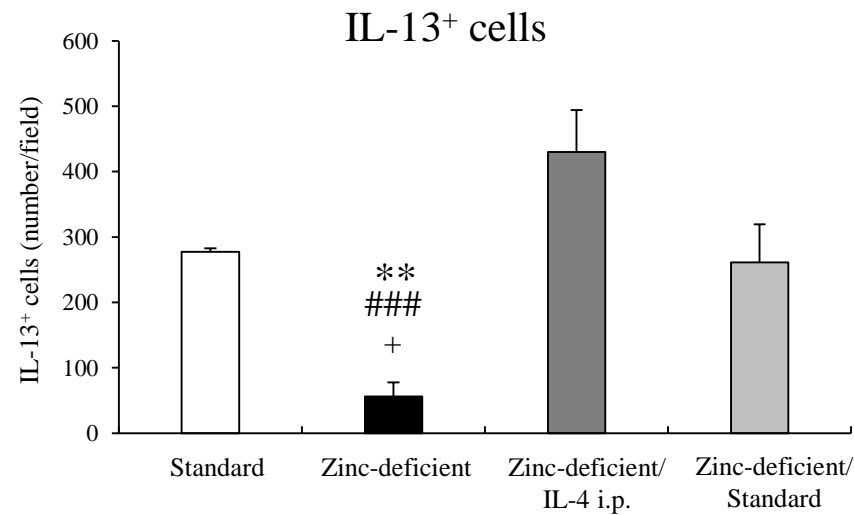

**Supplemental Fig. 2. Immunohistochemistry for IL-13 in spleens of rats on standard diet and zinc-deficient diet and injected with either saline (zinc-deficient) or IL-4 (zinc-deficient/IL-4 i.p.), or subsequently switched to a standard diet (zinc-deficient/standard).**

(a) Representative photomicrographs. Brown spots indicate immunohistochemical staining for IL-13 (a marker of Th2 cytokine). Magnification,  $400\times$ . (b) Number of positive cells per field. Data represent the mean  $\pm$  standard error (n = 5 per group). \*,  $P < 0.05$  vs. standard; #,  $P < 0.05$  vs. zinc-deficient/IL-4 i.p.; +,  $P < 0.05$  vs. zinc-deficient/standard by ANOVA, followed by the Student-Newman-Keuls test. i.p., intraperitoneal; IL, interleukin; ANOVA, analysis of variance.
