# Supplementary material
Source: PubMed Central journal article supplement (PMC6418430)
Supplement: IMM-156-356-s003.pdf [file IMM-156-356-s003.pdf]

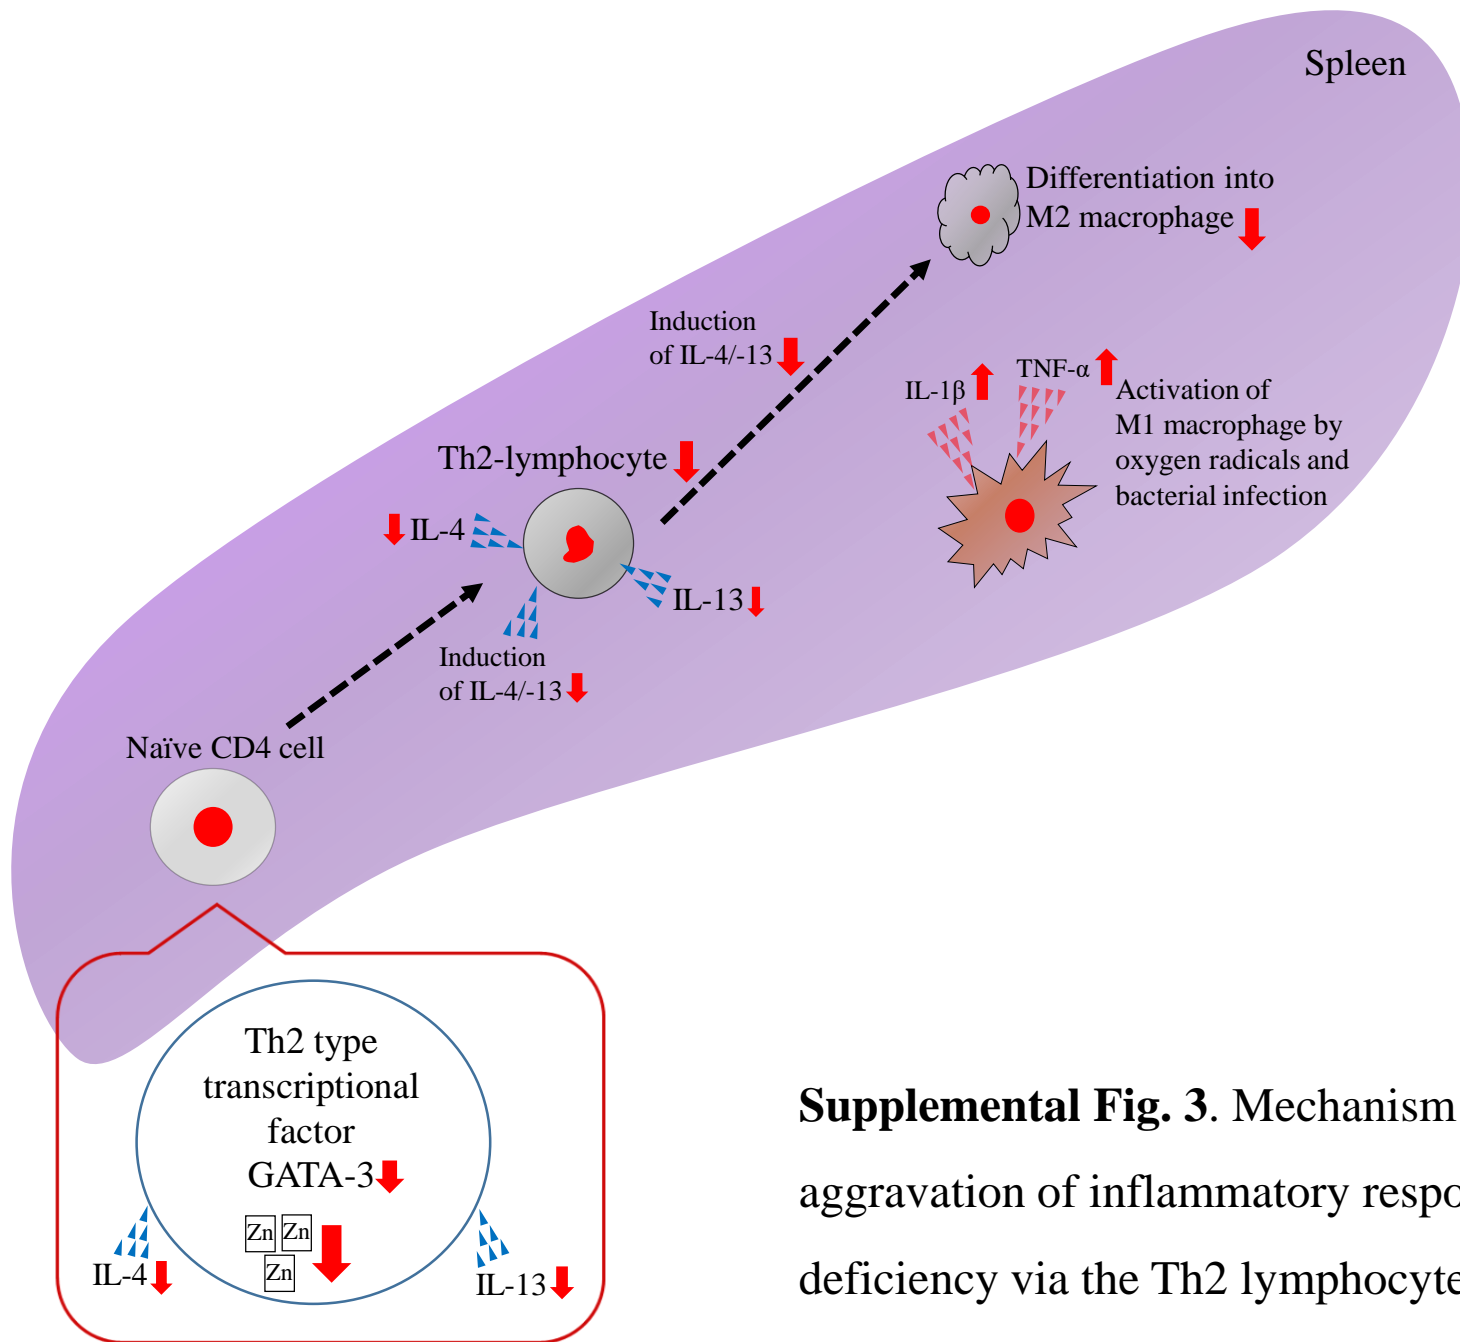

**Supplemental Fig. 3.** Mechanism underlying aggravation of inflammatory response by zinc deficiency via the Th2 lymphocyte–M2 macrophage pathway.
