# Supplementary material
Source: PubMed Central journal article supplement (PMC6418430)
Supplement: IMM-156-356-s004.pdf [file IMM-156-356-s004.pdf]

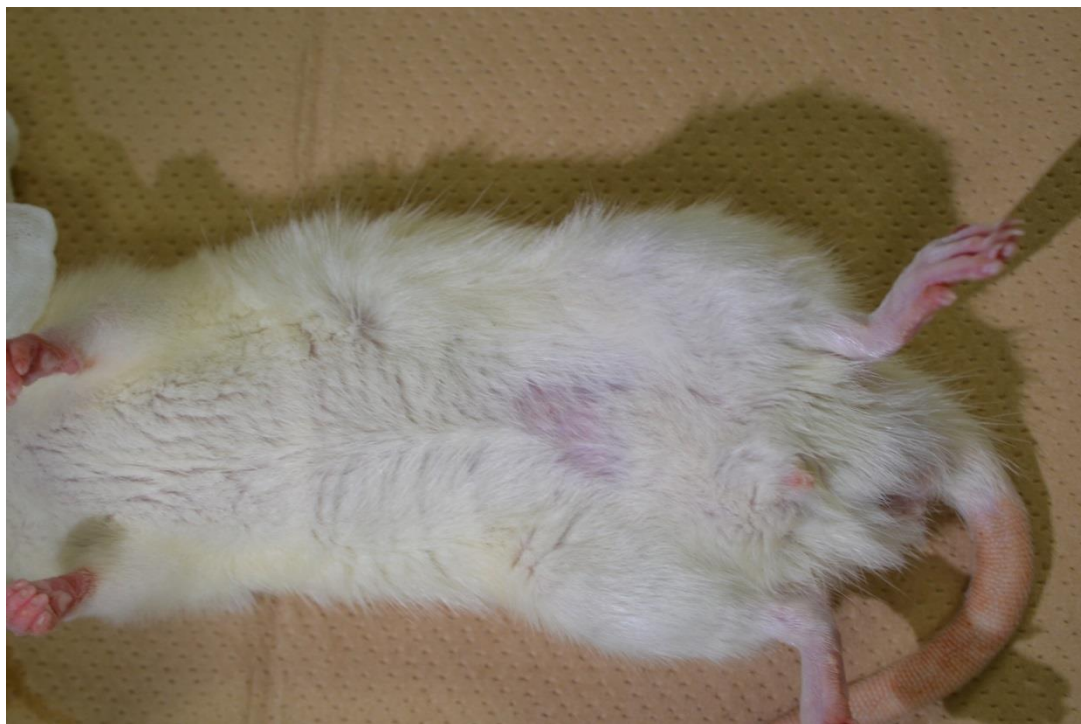

**Supplemental Fig. 4. Representative photograph of rats injected with IL-4 while on zinc-deficient diet for 6 weeks.**

※Mild depilation was observed by zinc-deficient/IL-4 i.p.
